# Supplementary material for: Encapsulation of Vitamin C by Glycerol-Derived Dendrimers, Their Interaction with Biomimetic Models of Stratum corneum and Their Cytotoxicity
Source: MDPI journal article supplement (doi:10.3390/molecules27228022), 2022-11-18
Supplement: s1 [file s1]

## Supplementary Materials

# Encapsulation of Vitamin C by Glycerol-Derived Dendrimers, Their Interaction with Biomimetic Models of *Stratum corneum* and Their Cytotoxicity

Katia Bacha <sup>1,2</sup>, Catherine Chemotti <sup>2</sup>, Jean-Claude Monboisse <sup>3</sup>, Anthony Robert <sup>1</sup>, Aurélien L. Furlan <sup>2</sup>, Willy Smeralda <sup>2</sup>, Christian Damblon <sup>4</sup>, Julien Estager <sup>5</sup>, Sylvie Brassart-Pasco <sup>3</sup>, Jean-Pierre Mbakidi <sup>1</sup>, Jelena Pršić <sup>2</sup>, Sandrine Bouquillon <sup>1,\*</sup> and Magali Deleu <sup>2,\*</sup>

<sup>1</sup> Molecular Chemistry Reims Institute, UMR CNRS 7312, Reims Champagne-Ardenne University, Boîte n° 44, B.P. 1039, F-51687 Reims, France

<sup>2</sup> Laboratory of Molecular Biophysics at Interfaces (LBMI), Gembloux Agro-Bio Tech-University of Liege, Passage des Déportés, 2 B-5030 Gembloux, Belgium

<sup>3</sup> Laboratoire de Biochimie Médicale et de Biologie Moléculaire, UMR CNRS/URCA 7369 (MEDyC), UFR Médecine, Reims Champagne Ardenne University, 51 Rue Cognacq Jay, F-51095 Reims, France

<sup>4</sup> Structural Biological Chemistry Laboratory, MolSys Research Unity, University of Liege, 11, Allée du six Août, 4000 Liège, Belgium

<sup>5</sup> Certech, Rue Jules Bordet, 45-Zone Industrielle C, B 7180 Seneffe, Belgium

\* Correspondence: sandrine.bouquillon@univ-reims.fr (S.B.); magali.deleu@uliege.be (M.D.)

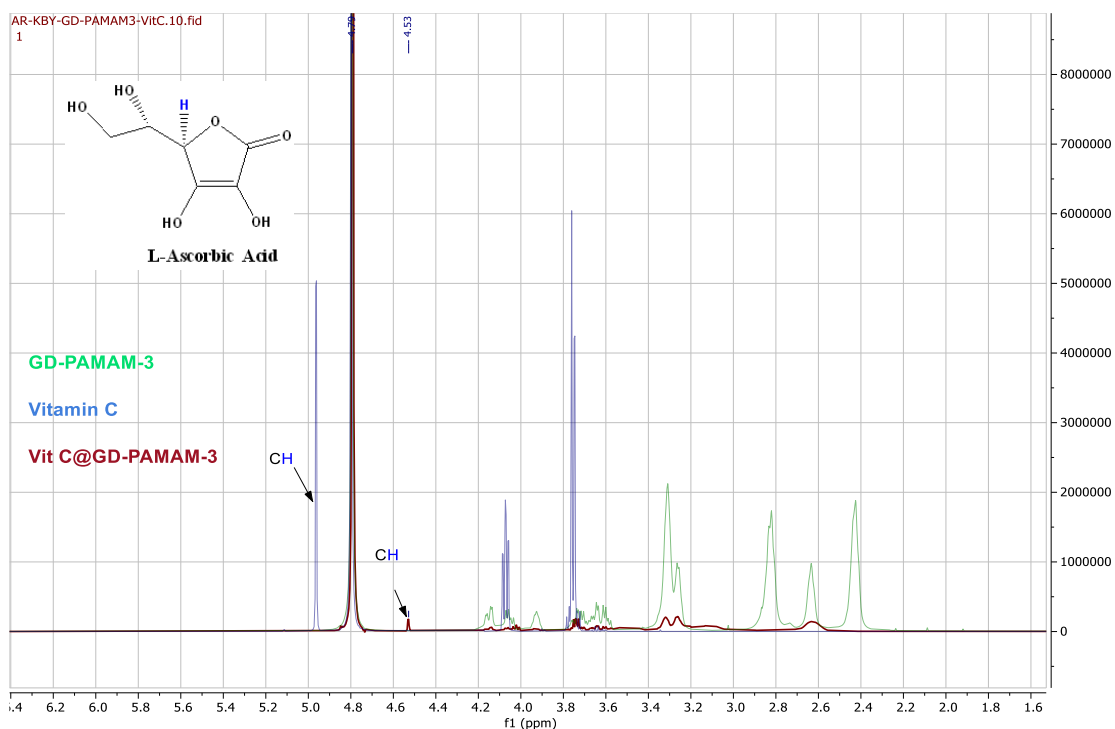

**Figure S1.** <sup>1</sup>H NMR of GD-PAMAM-3 (green), Vitamin C (blue) and Vit C@GD-PAMAM-3 (red) in D<sub>2</sub>O.

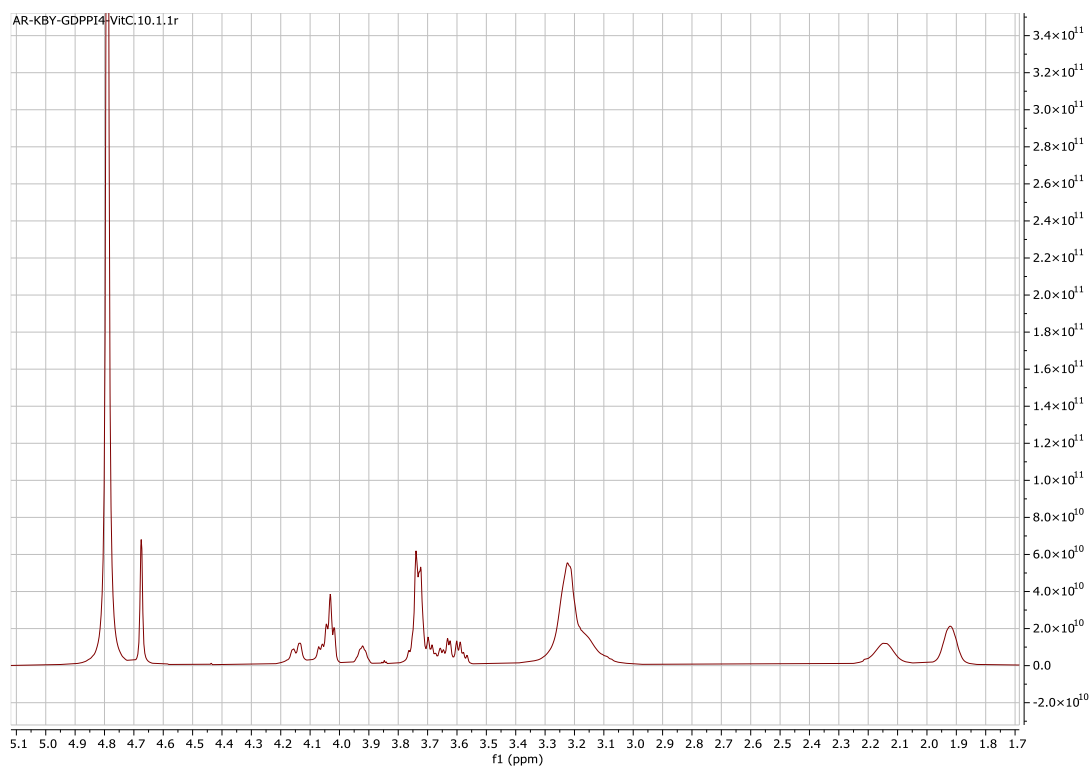

**Figure S2.**  $^1\text{H}$  NMR of Vit C@GD-PPI-4 in  $\text{D}_2\text{O}$ .

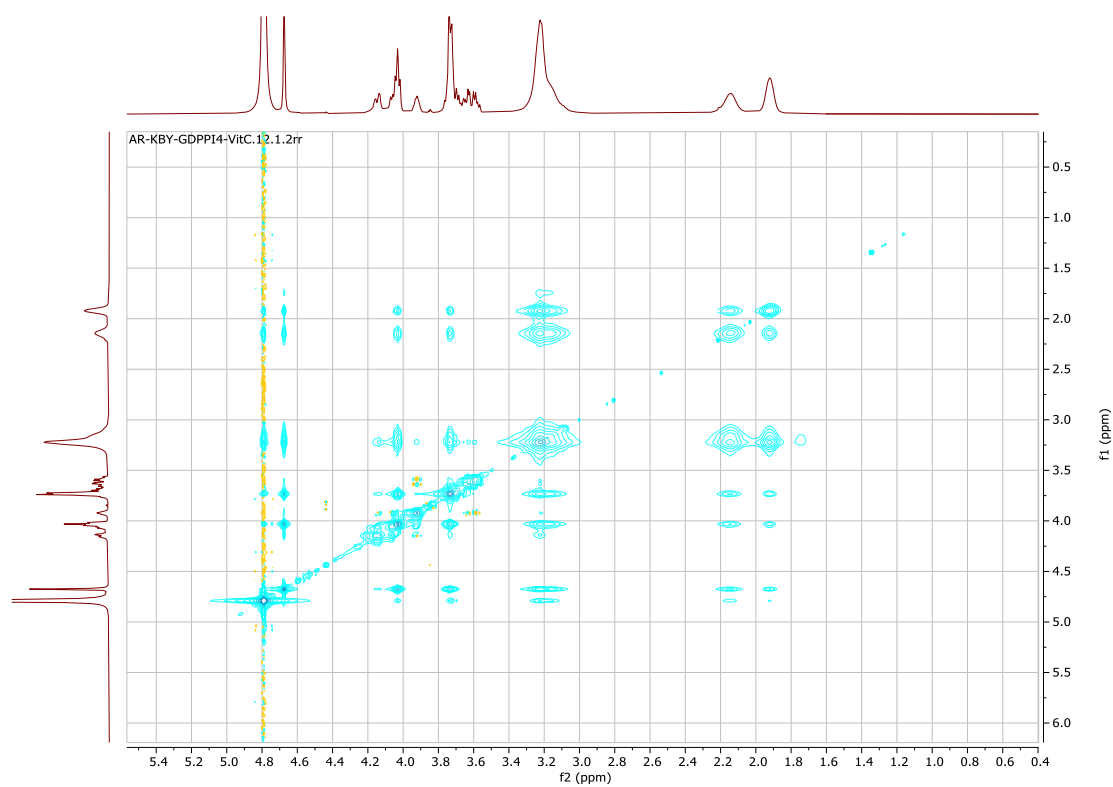

**Figure S3.** Vit C@GD-PPI-4 NOESY NMR shows NOE interactions between the protons of vitamin C (3.73, 4.03 and 4.64 ppm) with those of the GD-PPI-4 (1.92, 2.14 and 3.22 ppm) in  $\text{D}_2\text{O}$ .

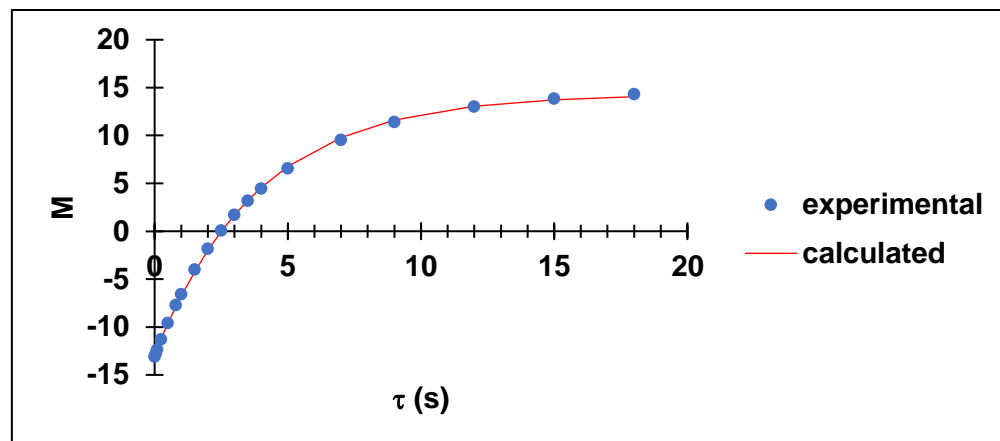

**Figure S4.** T<sub>1</sub> measurements of free Vitamin C: Experimental (blue dot) and calculated (red line) determination of T<sub>1</sub> for the <sup>1</sup>H (at 4.95 ppm which have the biggest value of T<sub>1</sub>) of free Vitamin C by inversion-recovery pulse sequence. We fit the curve by  $M = M_0 \left( 1 - k \exp\left(\frac{-\tau}{T_1}\right) \right)$  where  $M$  is the magnetization,  $M_0$  is the magnetization at  $\tau = 0$ s,  $\tau$  is the delay between the 180° and 90° pulses, and  $k$  is the efficiency of 180° pulse (if we have 180° pulse, we must have  $k = 2$ ). We find  $M_0 = 14.3$ ,  $k = 1.9$  and  $T_1 = 3.9$  s by this NMR sequence with 30 s of recycle delay (delay  $> 5 \times T_1$ ).

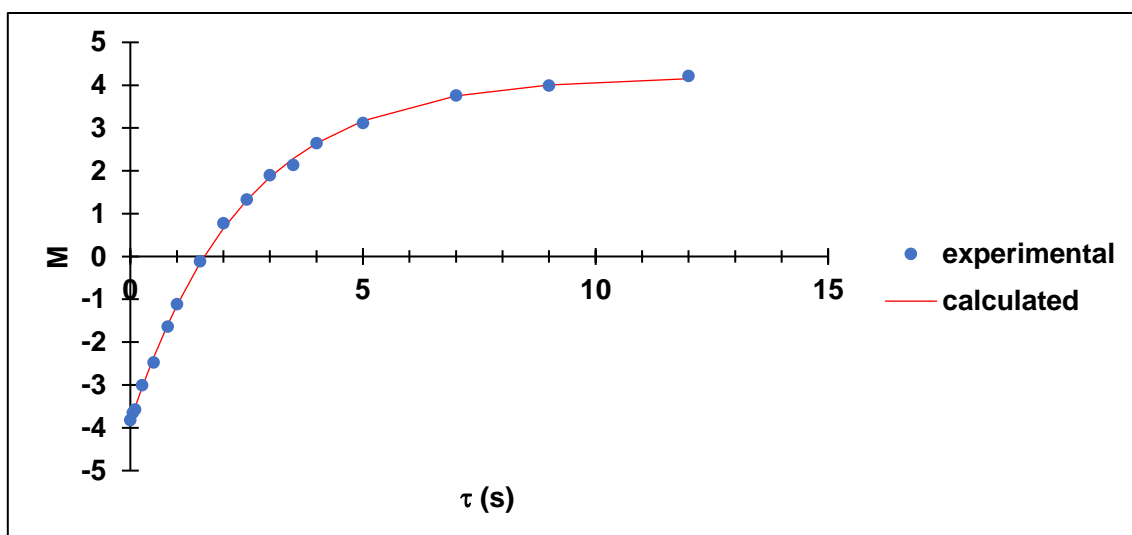

**Figure S5.** T<sub>1</sub> measurements of Vitamin C with GD-PAMAM3: Experimental (blue dot) and calculated (red line) determination of T<sub>1</sub> for the <sup>1</sup>H (at 4.53 ppm which have the biggest value of T<sub>1</sub>) of Vitamin-C with GD-PAMAM3 by inversion-recovery pulse sequence. We find  $M_0 = 4.2$ ,  $k = 1.91$  and  $T_1 = 2.45$  s by this NMR sequence with 40 s of recycle delay (delay  $> 5 \times T_1$ ).

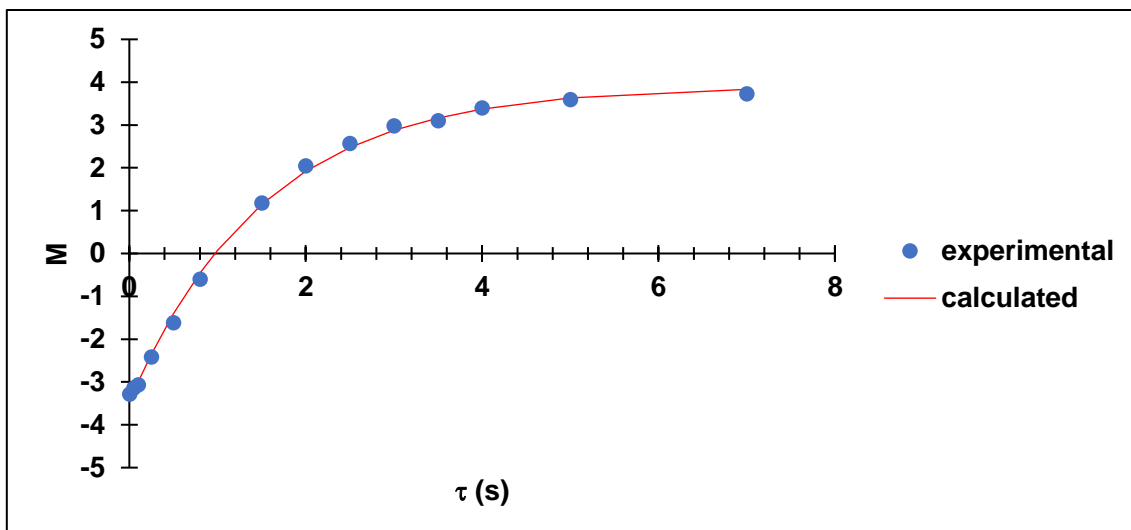

**Figure S6.** T<sub>1</sub> measurements of Vitamin C with GD-PPI4: Experimental (blue dot) and calculated (red line) determination of T<sub>1</sub> for the <sup>1</sup>H (at 4.68 ppm which have the biggest value of T<sub>1</sub>) of Vitamin C with GD-PPI4 by inversion-recovery pulse sequence. We find  $M_0 = 3.9$ ,  $k = 1.89$  and  $T_1 = 1.5$  s by this NMR sequence with 40 s of recycle delay (delay  $> 5 \times T_1$ ).

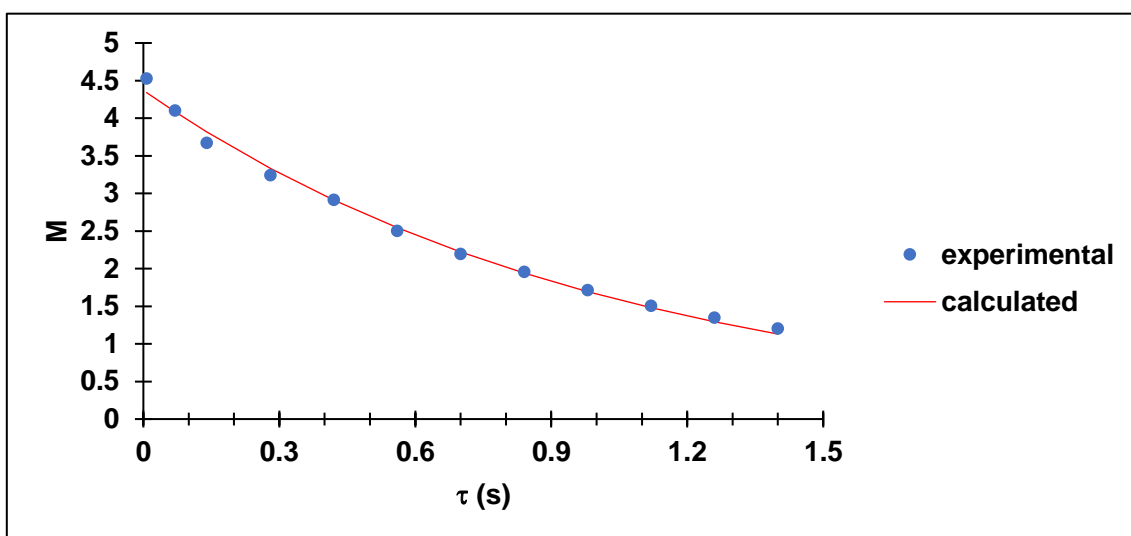

**Figure S7.** T<sub>2</sub> measurements of free Vitamin C: Experimental (blue dot) and calculated (red line) determination of T<sub>1</sub> for the <sup>1</sup>H (at 4.08 ppm) of free Vitamin C by CPMG pulse sequence. We fit the curve by  $M = M_0 \exp\left(\frac{-\tau}{T_2}\right)$  where  $M$  is the magnetization,  $M_0$  is the magnetization at  $\tau = 0$ s, and  $\tau$  is the delay between the 90° pulse and the beginning of signal acquisition. We find  $M_0 = 4.37$  and  $T_2 = 1.0$  s by this NMR sequence with 40 s of recycle delay

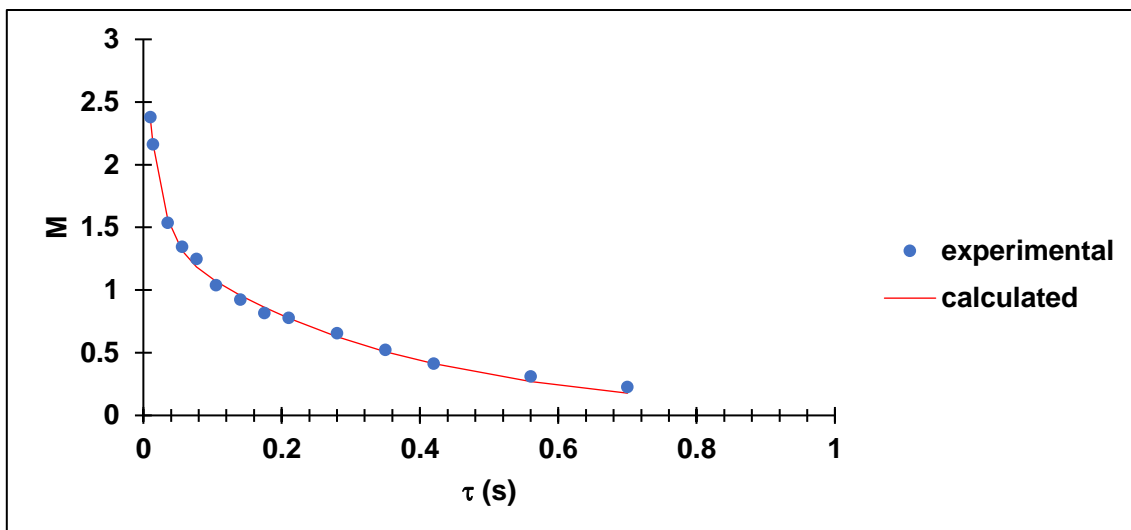

**Figure S8.** T<sub>2</sub> measurements of Vitamin C with GD-PAMAM3: Experimental (blue dot) and calculated (red line) determination of T<sub>2</sub> for the <sup>1</sup>H (at 4.05 ppm) of Vitamin C with GD-PAMAM3 by CPMG pulse sequence. There are two kind of signal (dendrimer and Vitamin-C) so we fit the curve by  $M = k_d \times M_{0d} \times \exp\left(\frac{-\tau}{T_{2d}}\right) + k_v \times M_{0v} \times \exp\left(\frac{-\tau}{T_{2v}}\right)$  where subscripts *d* and *v* designate dendrimer and vitamin-C respectively. Finally, we find  $k_v \times M_{0v} = 1.45$ , and  $T_2 = 0.33$  s by this NMR sequence with 40 s of recycle delay.

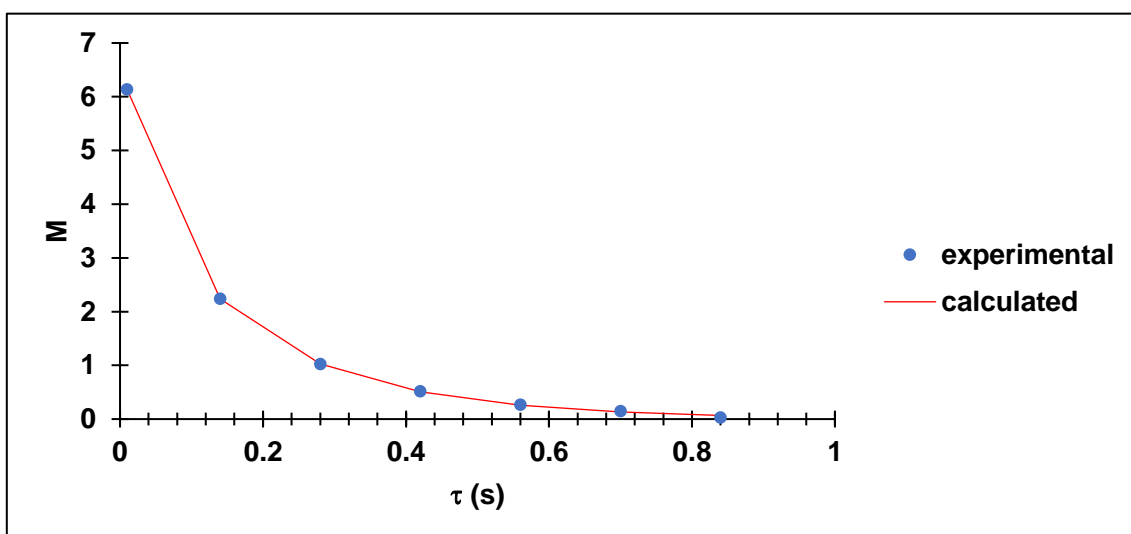

**Figure S9.** T<sub>2</sub> measurements of Vitamin C with GD-PPI4: Experimental (blue dot) and calculated (red line) determination of T<sub>2</sub> for the <sup>1</sup>H (at 4.15 ppm) of Vitamin-C with GD-PPI4 by CPMG pulse sequence. There are two kinds of signal (dendrimer and Vitamin-C). Finally, we find  $k_v \times M_{0v} = 3.87$ , and  $T_2 = 0.20$  s by this NMR sequence with 10 s of recycle delay.

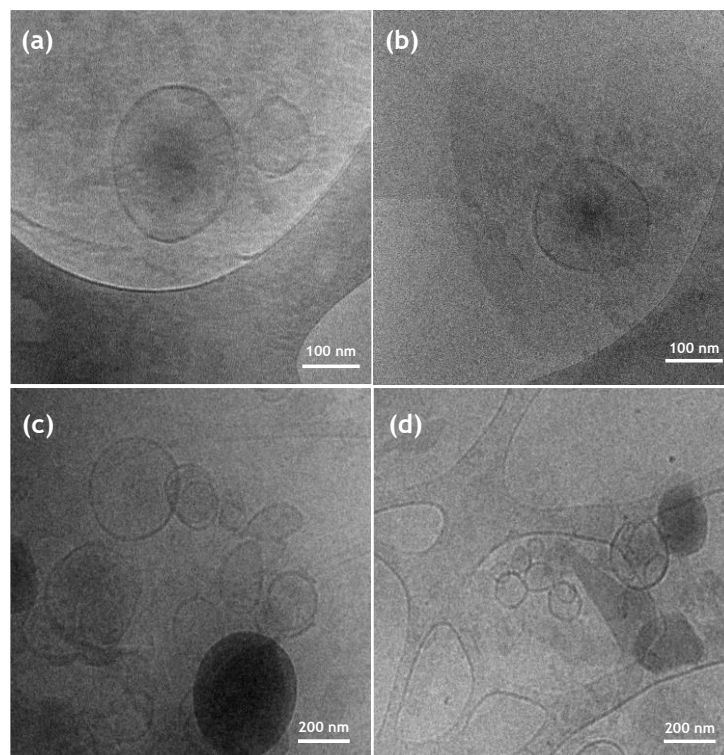

**Figure S10.** Cryo-TEM images of liposomes at 1.2 mM: (a) and (b) in absence of GD-PAMAM-3 showing few and isolated Large unilamellar vesicles (LUVs), (c) and (d) in presence of GD-PAMAM-3 at 0.48  $\mu$ M showing some liposome aggregation.
